# Supplementary material
Source: PubMed Central journal article supplement (PMC9670203)
Supplement: EMBJ-41-e111540-s009.pdf [file EMBJ-41-e111540-s009.pdf]

## Appendix

### Table of Contents

**Appendix Table S1:** Crystallographic data and refinement

**Appendix Figure S1:** The CapH I99M mutation disrupts tetramer formation

**Appendix Figure S2:** Structure of the CapP GAF domain

**Appendix Figure S3:** Edman degradation of CapP cleavage product

**Appendix Table S1. Crystallographic data and refinement**

|                                                 | <i>Thauera</i> sp. K11<br>CapP SeMet | <i>Thauera</i> sp. K11<br>CapP Native | <i>E. coli</i> MS115-1<br>CapH NTD            | <i>E. coli</i> MS115-1<br>CapH CTD | <i>E. coli</i> MS115-1<br>CapH CTD (I99M) |
|-------------------------------------------------|--------------------------------------|---------------------------------------|-----------------------------------------------|------------------------------------|-------------------------------------------|
| <b>Data collection</b>                          |                                      |                                       |                                               |                                    |                                           |
| Synchrotron/Beamline                            | SSRL 9-2                             | SSRL 9-2                              | ALS 5.0.2                                     | ALS 5.0.2                          | APS 24ID-C                                |
| Date collected                                  | 02/14/2020                           | 02/14/2020                            | 04/25/2021                                    | 5/14/21                            | 07/11/21                                  |
| Resolution (Å)                                  | 40-1.6                               | 40-1.35                               | 40-1.02                                       | 100-1.75                           | 59-1.26                                   |
| Wavelength (Å)                                  | 0.97892                              | 0.97892                               | 1.00003                                       | 1.00004                            | 0.97918                                   |
| Space Group                                     | P4 <sub>2</sub> 2 <sub>1</sub> 2     | P4 <sub>2</sub> 2 <sub>1</sub> 2      | P2 <sub>1</sub> 2 <sub>1</sub> 2 <sub>1</sub> | P2 <sub>1</sub>                    | P4 <sub>3</sub> 2 <sub>1</sub> 2          |
| Unit Cell Dimensions (a, b, c) Å                | 95.28, 95.28,<br>103.95              | 95.31, 95.31,<br>104.92               | 32.38, 39.68,<br>47.24                        | 44.02, 39.86,<br>46.26             | 38.38, 38.38,<br>59.43                    |
| Unit cell Angles (α,β,γ) °                      | 90, 90, 90                           | 90, 90, 90                            | 90, 90, 90                                    | 90, 98.73, 90                      | 90, 90, 90                                |
| I/σ (last shell)                                | 21.2 (0.9)                           | 18.7 (0.8)                            | 12.5 (2.0)                                    | 26.2 (1.1)                         | 21.1 (2.0)                                |
| <sup>1</sup> R <sub>sym</sub> (last shell)      | 0.082 (2.61)                         | 0.058 (2.884)                         | 0.068 (0.424)                                 | 0.059 (0.637)                      | 0.039 (0.732)                             |
| <sup>2</sup> R <sub>meas</sub> (last shell)     | 0.085 (2.723)                        | 0.06 (3.012)                          | 0.074 (0.516)                                 | 0.070 (0.784)                      | 0.043 (0.809)                             |
| <sup>3</sup> CC <sub>1/2</sub> (last shell)     | 1 (0.529)                            | 0.999 (0.443)                         | 0.997 (0.814)                                 | 1 (0.631)                          | 0.999 (0.830)                             |
| Completeness (last shell) %                     | 100.0 (99.8)                         | 99.8 (98.1)                           | 80.8 (11.8)                                   | 99.5 (98.8)                        | 99.8 (98.3)                               |
| Number of reflections                           | 839884                               | 1388162                               | 144010                                        | 50378                              | 74958                                     |
| <i>unique</i>                                   | 63659                                | 106052                                | 25495                                         | 15936                              | 12610                                     |
| Multiplicity (last shell)                       | 13.2 (12.4)                          | 13.1 (11.7)                           | 5.6 (3.0)                                     | 3.2 (2.8)                          | 5.9 (5.5)                                 |
| <b>Refinement</b>                               |                                      |                                       |                                               |                                    |                                           |
| Resolution (Å)                                  | -                                    | 40-1.35                               | 30.4-1.02                                     | 45.7-1.75                          | 32.2-1.26                                 |
| No. of reflections                              | -                                    | 105839                                | 25448                                         | 15917                              | 12560                                     |
| <i>working</i>                                  | -                                    | 102934                                | 24251                                         | 15208                              | 11966                                     |
| <i>free</i>                                     | -                                    | 2905                                  | 1197                                          | 709                                | 594                                       |
| <sup>4</sup> R <sub>work</sub> (last shell) (%) | -                                    | 16.21 (42.68)                         | 16.30 (17.77)                                 | 20.98 (28.61)                      | 19.13 (22.50)                             |
| <sup>4</sup> R <sub>free</sub> (last shell) (%) | -                                    | 16.79 (43.92)                         | 17.64 (17.00)                                 | 23.70 (31.23)                      | 21.36 (24.19)                             |
| <b>Structure/Stereochemistry</b>                |                                      |                                       |                                               |                                    |                                           |
| No. of atoms                                    | -                                    | 4741                                  | 1166                                          | 2531                               | 642                                       |
| <i>solvent</i>                                  | -                                    | 343                                   | 87                                            | 60                                 | 46                                        |
| <i>ligand</i>                                   | -                                    | 0                                     | 10                                            | 0                                  | 0                                         |
| <i>hydrogen</i>                                 | -                                    | 2159                                  | 536                                           | 1212                               | 297                                       |
| r.m.s.d. bond lengths (Å)                       | -                                    | 0.008                                 | 0.008                                         | 0.010                              | 0.011                                     |
| r.m.s.d. bond angles (°)                        | -                                    | 0.94                                  | 0.993                                         | 1.000                              | 0.896                                     |
| Ramachandran<br>favored/allowed (%)             | -                                    | 98.2%/100%                            | 100%/100%                                     | 99.3%/100%                         | 100%/100%                                 |
| Molprobit score                                 | -                                    | 0.82                                  | 0.78                                          | 0.64                               | 1.31                                      |
| <sup>5</sup> SBGrid Data Bank ID                | 865                                  | 864                                   | 866                                           | 867                                | 868                                       |
| <sup>6</sup> Protein Data Bank ID               | -                                    | 7T5T                                  | 7T5U                                          | 7T5W                               | 7T5V                                      |

<sup>1</sup>R<sub>sym</sub> =  $\frac{\sum_j |I_j - \langle I \rangle|}{\sum_j I_j}$ , where  $I_j$  is the intensity measurement for reflection  $j$  and  $\langle I \rangle$  is the mean intensity for multiply recorded reflections.

$$^2R_{\text{meas}} = \sum_h [ \sqrt{n/(n-1)} \sum_j [I_{hj} - \langle I_h \rangle] / \sum_{hj} \langle I_h \rangle ]$$

where  $I_{hj}$  is a single intensity measurement for reflection  $h$ ,  $\langle I_h \rangle$  is the average intensity measurement for multiply recorded reflections, and  $n$  is the number of observations of reflection  $h$ .

<sup>3</sup>CC<sub>1/2</sub> is the Pearson correlation coefficient between the average measured intensities of two randomly assigned half-sets of the measurements of each unique reflection. CC<sub>1/2</sub> is considered significant above a value of ~0.15.

<sup>4</sup>R<sub>work, free</sub> =  $\frac{\sum | |F_{\text{obs}}| - |F_{\text{calc}}| |}{\sum |F_{\text{obs}}|}$ , where the working and free  $R$ -factors are calculated using the working and free reflection sets, respectively.

<sup>5</sup>Diffraction data for each structure have been deposited with the SBGrid Data Bank (<https://data.sbgrid.org>) with the noted accession codes.

<sup>6</sup>Coordinates and structure factors for each structure have been deposited with the Protein Data Bank (<http://www.rcsb.org>) with the noted accession codes.

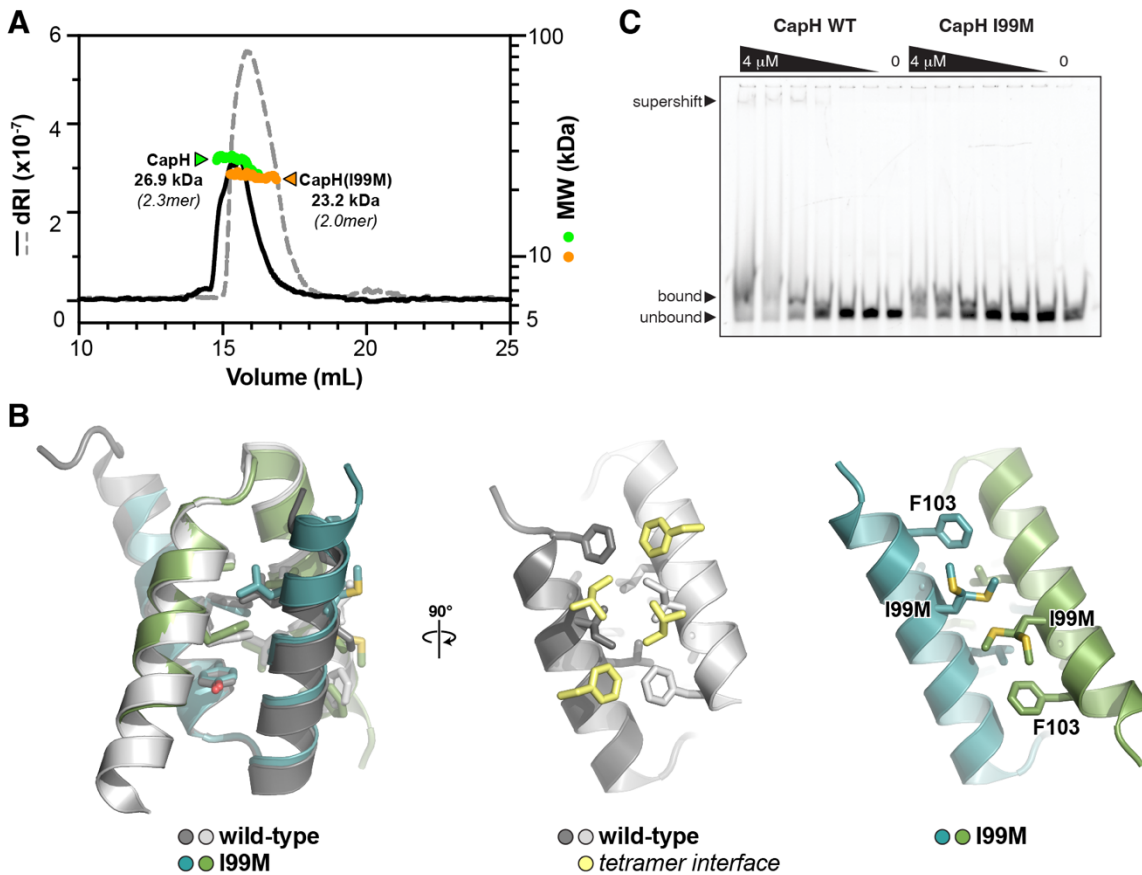

### Appendix Figure S1. The CapH I99M mutation disrupts tetramer formation

(A) Size exclusion chromatography coupled to multiangle light scattering chromatogram of CapH and CapH I99M proteins without tags.

(B) *Left*: Cartoon view of the *E. coli* MS115-1 CapH<sup>CTD</sup> (I99M) structure, with the two protomers colored blue and green. Overlaid is the structure of wild-type CapH<sup>CTD</sup> (dark gray/light gray). *Center*: Views of the wild-type CapH<sup>CTD</sup> tetramerization interface, with the dimer shown in dark gray/light gray and interacting residues from the opposite dimer in light yellow. *Right*: View of the CapH<sup>CTD</sup> (I99M) tetramerization interface, showing the position of the I99M mutation that disrupts tetramer formation. In the electron density maps, the M99 residues showed partial occupancy for two rotamers, and were modeled with each rotamer at 50% occupancy (both shown as sticks).

(C) Electrophoretic mobility shift of 5'-FAM labeled DNA with a sequence comprised of residues 81-120 of the intergenic region of MS115-1 CBASS after incubation with either wild-type or I99M CapH. Protein concentrations are 4  $\mu$ M and two-fold dilutions thereof.

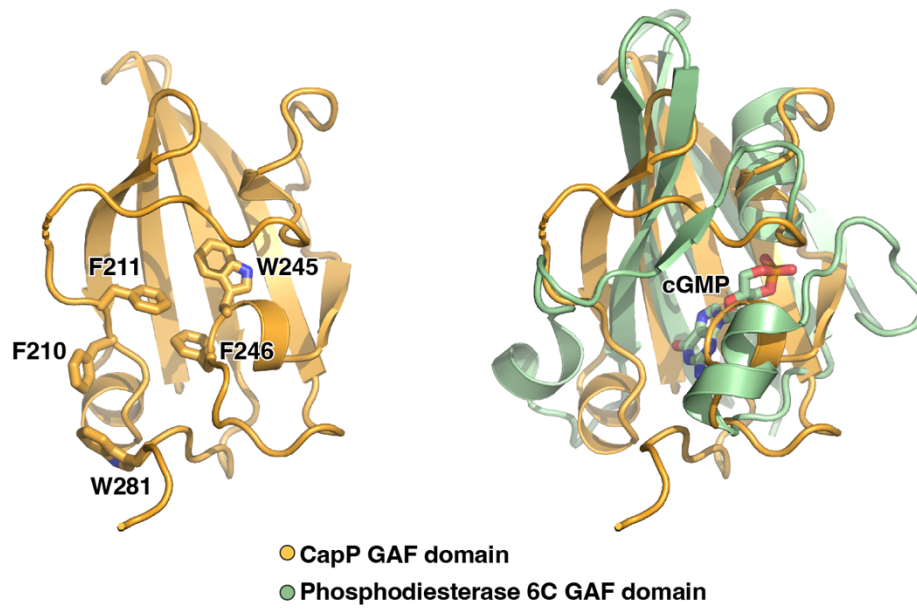

**Appendix Figure S2: Structure of the CapP GAF domain**

Structural overlay between the *Thauera* sp. K11 CapP GAF domain (orange) and the GAF domain of phosphodiesterase 6C bound to cyclic GMP (green; PDB ID 3DBA; (Martinez et al., 2008)). Surface-exposed aromatic residues potentially involved in CapP-ligand binding are shown as sticks in the left panel.

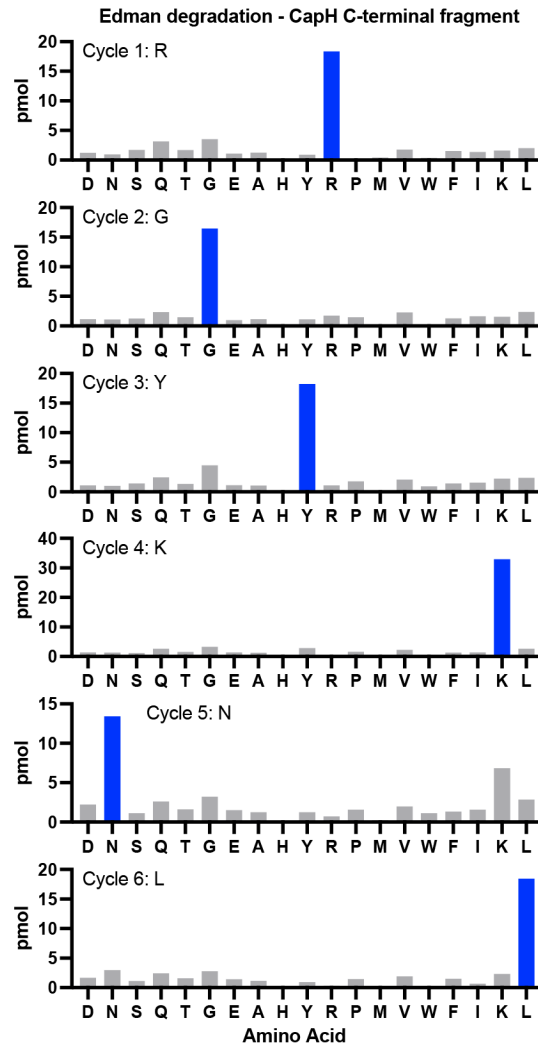

**Appendix Figure S3: Edman degradation of CapP cleavage product**

Bar graphs showing picomoles (pmol) of each amino acid detected by Edman degradation of the C-terminal cleavage product of MBP-CapH-GFP (denoted by red asterisk in **Figure 5B**). The dominant amino acid for each cycle is shown as a blue bar. The inferred N-terminal sequence (RGYKNL) matches CapH residues 83-88 (see **Figure 5C**).
