# Supplementary material
Source: PubMed Central journal article supplement (PMC9670203)
Supplement: EMBJ-41-e111540-s011.pdf [file EMBJ-41-e111540-s011.pdf]

## Expanded View Figures

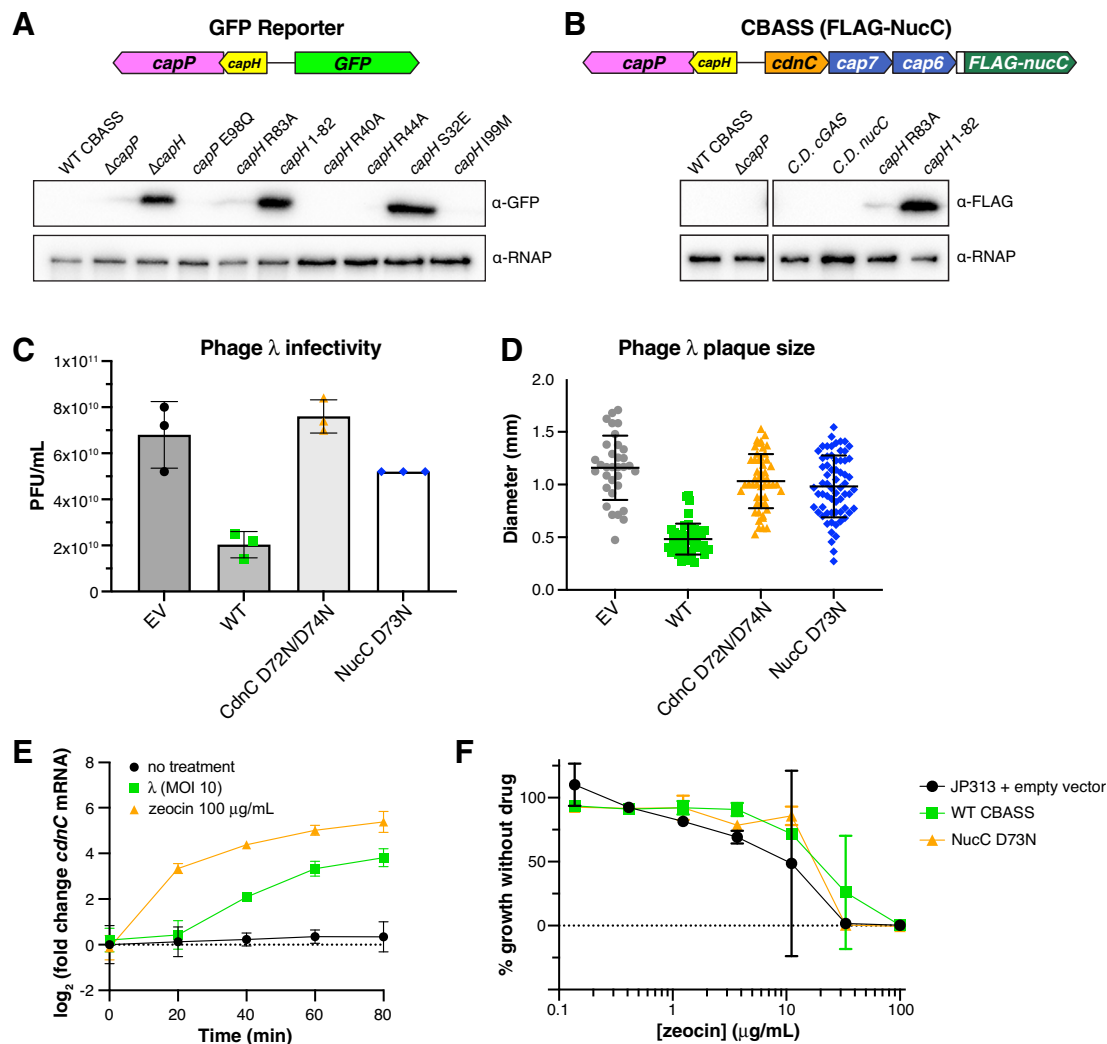

**Figure EV1. CBASS expression reporter systems.**

**A** Full Western blot for GFP reporter assay.  $\alpha$ -RNAP, anti-RNA Polymerase loading control.

**B** Full Western blot for FLAG-NucC expression reporter assay.  $\alpha$ -RNAP, anti-RNA Polymerase loading control.

**C** Quantitative plaque assay showing infectivity of  $\lambda$   $cl^{-}$  against cells containing no CBASS system (EV, empty vector), the wild-type *E. coli* MS115-1 CBASS system (WT), or mutant systems with catalytic-dead CdnC (D72N/D74N) or NucC (D73N). Data are shown as average and standard deviation of plaque forming units per ml of purified phage (PFU/ml), from triplicate experiments. For NucC D73N, all three plates showed equal plaques (52 plaques at the tested dilution).

**D** Size of phage plaques for  $\lambda$   $cl^{-}$  infecting cells containing no CBASS system (EV, empty vector;  $n = 33$ ), the wild-type *E. coli* MS115-1 CBASS system (WT;  $n = 46$ ), or mutant systems with catalytic-dead CdnC (D72N/D74N;  $n = 51$ ) or NucC (D73N;  $n = 65$ ). Data are shown as average and standard deviation of all plaques counted in panel (C).

**E** qRT-PCR for *cdcN* using JP313 cells containing the *E. coli* MS115-1 CBASS operon on a plasmid under exponential growth conditions (black circles), after phage  $\lambda$  infection at MOI 10 (green squares), or after addition of zeocin at 100  $\mu$ g/ml (orange triangles). Error bars indicate standard deviation from three technical replicates each of three biological replicates (nine total measurements per condition).

**F** Minimum inhibitory concentration (MIC) analysis of JP313 cells with either empty vector (black circles), *E. coli* MS115-1 CBASS (green squares), or a mutant CBASS system with catalytic-dead NucC (D73N; orange triangles). Data shown are the average and standard deviation of three biological replicates (see Materials and Methods).

Source data are available online for this figure.

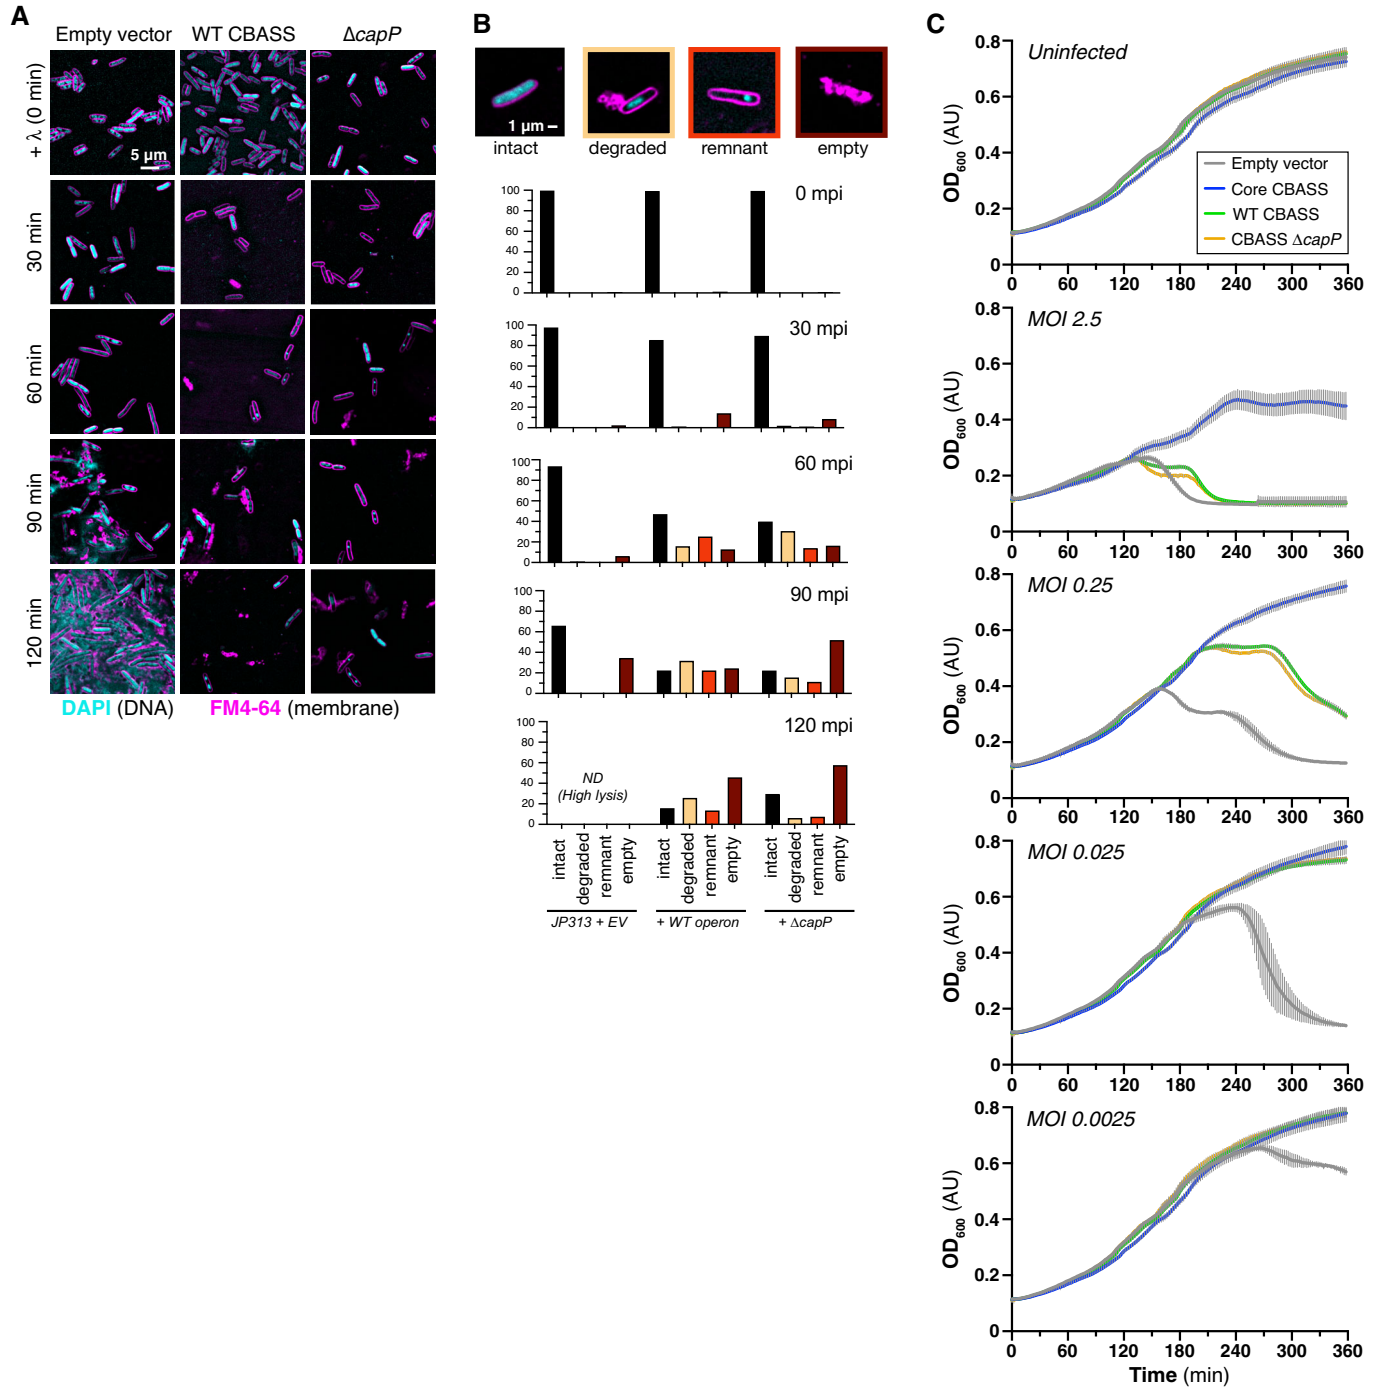

**Figure EV2. Phage infection of cells with *E. coli* MS115-1 CBASS.**

- A Live-cell fluorescence microscopy of  $\lambda$   $cl^-$  infecting cells containing no CBASS system (EV, empty vector), the wild-type *E. coli* MS115-1 CBASS system (WT), or a mutant system lacking *capP* ( $\Delta capP$ ). DNA (DAPI) is colored cyan, and cell membranes (FM4-64) are colored magenta.
- B Quantification of fluorescence microscopy of  $\lambda$   $cl^-$  infecting cells containing no CBASS system (EV, empty vector), the wild-type *E. coli* MS115-1 CBASS system (WT), or a mutant system lacking *capP* ( $\Delta capP$ ). Cells were manually quantified and assigned categories based on examples shown at top ( $n \geq 30$  cells for each strain and time point).
- C Growth curves of JP313 cells containing plasmids with no insert (Empty vector; gray), the core four CBASS genes under a lac-inducible promoter (Core CBASS; blue; Lau et al, 2020), the six-gene CBASS system (WT CBASS; green), or the six-gene CBASS system with *capP* deleted (CBASS  $\Delta capP$ ; orange). All strains grew comparably when not infected with phage (Uninfected, top) and showed differing levels of protection when infected with phage  $\lambda$  at different multiplicity of infection (MOI). Data shown are the average and standard deviation of three independent measurements.

Source data are available online for this figure.

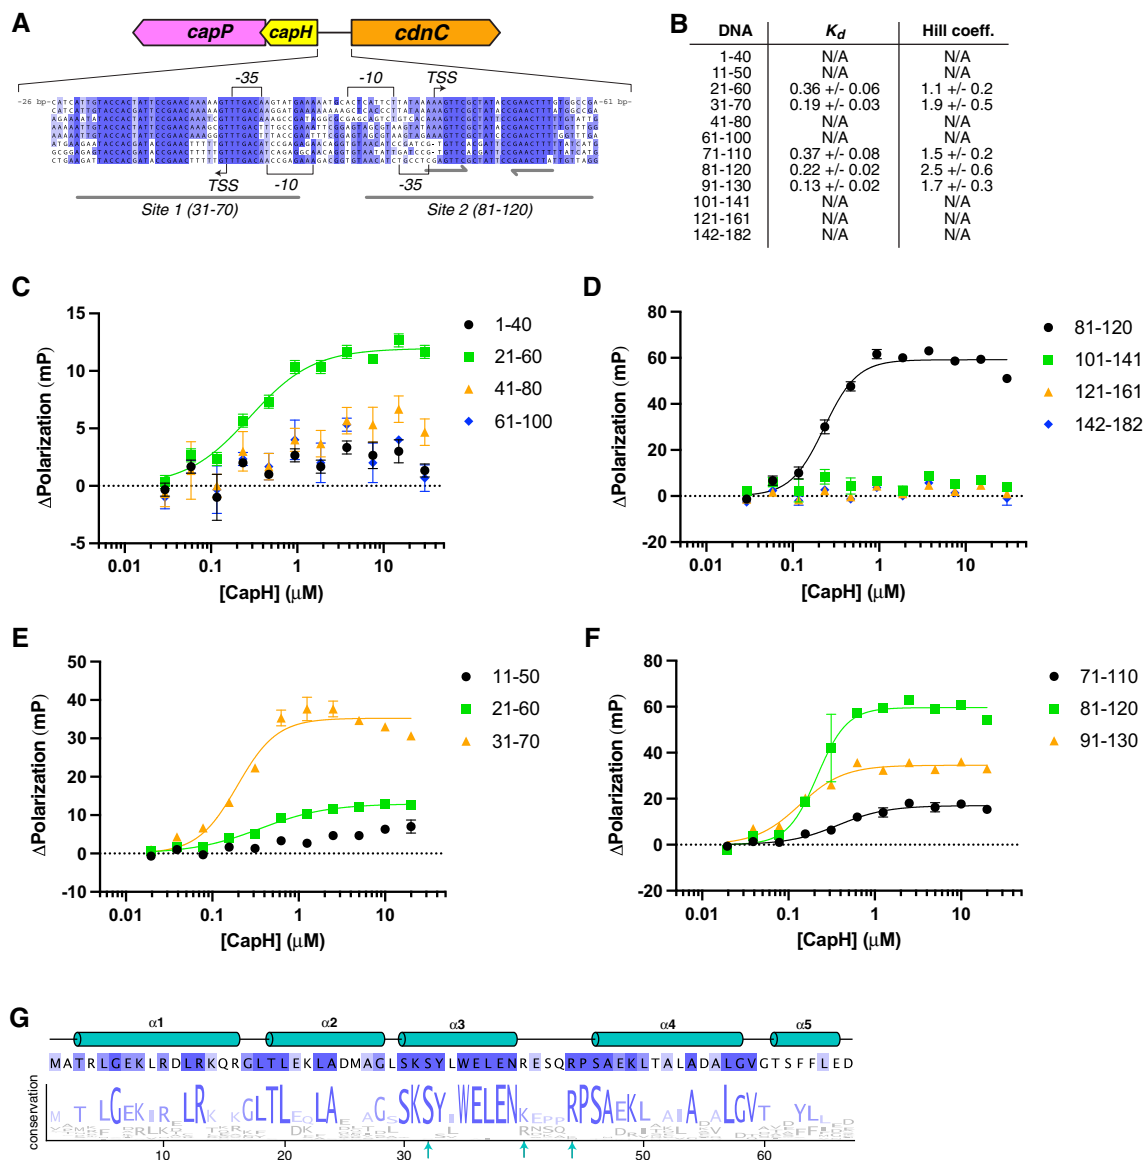

**Figure EV3. CapH binds MS115-1 CBASS intergenic region.**

**A** Sequence alignment of CBASS promoter regions in *E. coli* MS115-1 (NCBI RefSeq GG771785.1), *Cronobacter sakazakii* strain cro3915C2 (NZ\_NRY01000012.1), *Pseudomonas stutzeri* strain KC NODE\_1\_length\_951488\_cov\_16.453 (NZ\_POUN01000001.1), *Pseudomonas* sp. RIT 412 RIT412\_S3\_7 (NZ\_QBJA02000007.1), *Pseudomonas* sp. MF4836 (NZ\_MVOL01000002.1), *Burkholderia pseudomallei* strain MSHR4301 (NZ\_LXCNO1000015.1), *Ralstonia insidiosa* strain WCHRI065162 (NZ\_PKPC01000011.1), *Thauera* sp. K11 plasmid pTX1 (NZ\_CP023440.1). Promoter sequences (−35, −10, and TSS) were predicted by the BPPROM server (Solovveyev & Salamov, 2011). Identified CapH-binding Sites 1 and 2 are denoted by gray underlines, and the palindrome within Site 2 is denoted by gray arrows.

**B** DNA binding affinity ( $K_d$ ) and cooperativity (Hill coefficient) from fluorescence polarization measurements of CapH binding overlapping 40–41 bp DNAs spanning the *E. coli* MS115-1 CBASS promoter region (Fig 2A).

**C–F** Fluorescence polarization assays showing binding of *E. coli* MS115-1 CapH (His<sub>6</sub>-MBP tagged) to 40–41 bp DNAs spanning the *E. coli* MS115-1 CBASS promoter region. Fit  $K_d$  and Hill coefficient for each DNA is shown in panel (B). Error bars indicate standard deviation from three technical replicates.

**G** Schematic of the CapH NTD with sequence logo indicating the conservation of each residue in an alignment of 56 unique CBASS-associated CapH proteins.

Source data are available online for this figure.

**Figure EV4. CBASS-associated CapP contains an internal cysteine switch.**

- A Operon schematic of the *Thauera* sp. K11 CBASS system, compared to the *E. coli* MS115-1 system, with sequence identity between the two systems' CapH and CapP proteins indicated.
- B Structure of *Thauera* sp. K11 CapP, with close-up of its Zn<sup>2+</sup> metallopeptidase domain (pink) with internal cysteine switch loop (blue) and cysteine switch residue (C113).
- C Structure of human matrix metalloprotease MMP9 (PDB IF 1L6; Elkins et al, 2002), with close-up of its Zn<sup>2+</sup> metallopeptidase domain (pink) and N-terminal cysteine switch domain (blue) and cysteine switch residue (C99). The orientation of the Zn<sup>2+</sup> metallopeptidase domains in panels (B) and (C) is identical.
- D Evolutionary tree of 408 CBASS-associated CapP proteins, colored by the presence (black) or absence (blue) of the internal cysteine switch.

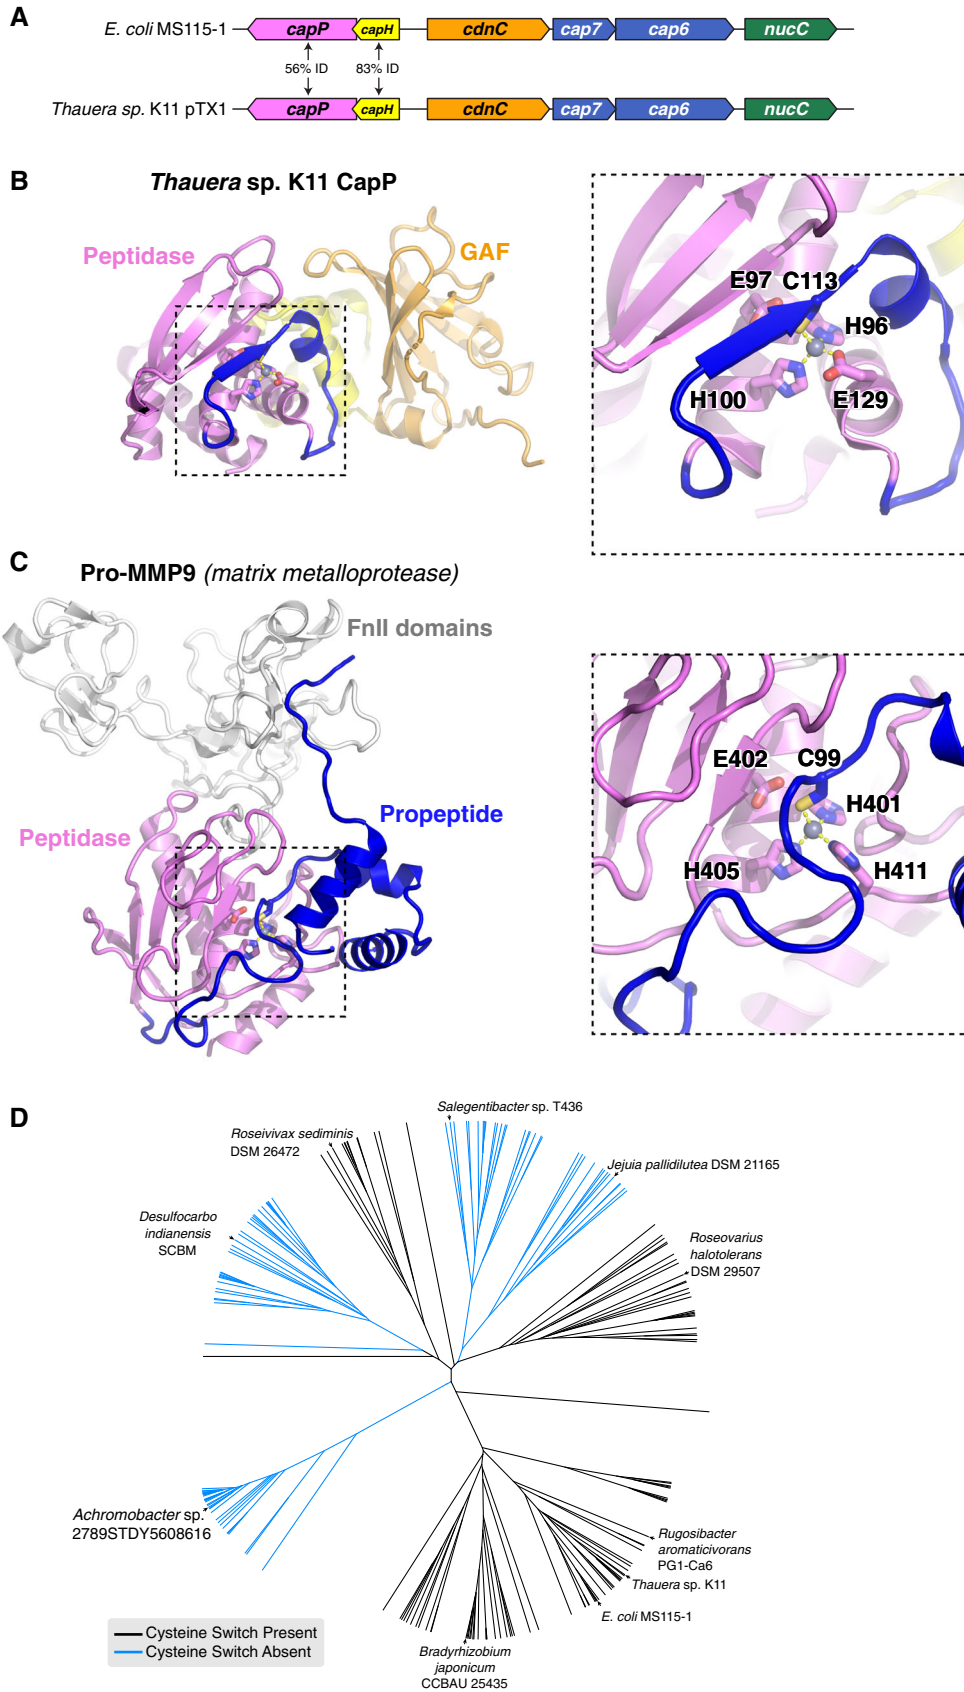

Figure EV4.

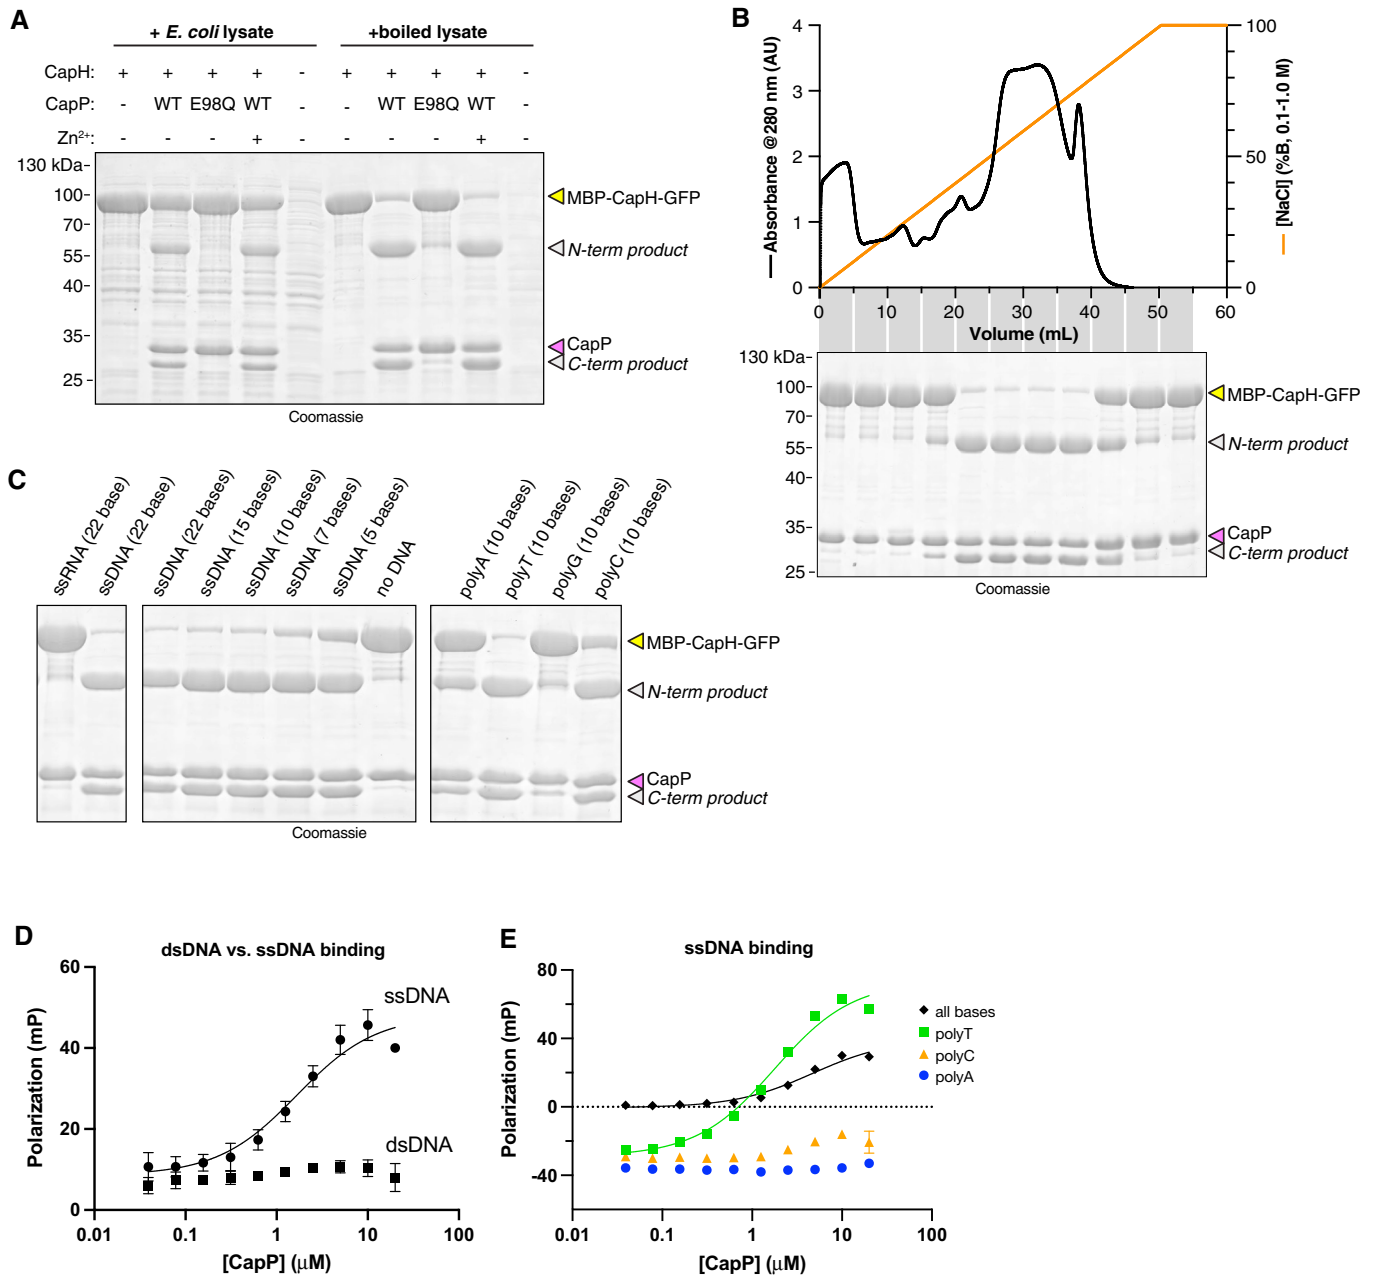

**Figure EV5. DNA-mediated activation of CapP.**

A *In vitro* cleavage assay with purified *E. coli* MS115-1 CapP (wild-type or catalytic-dead E98Q mutant), MBP-CapH-GFP, and *E. coli* cell lysate.  
 B *Top*: UV absorbance (280 nm) of boiled *E. coli* cell lysate separated by HiTrap Q column. Gradient (orange line) goes from 100 mM NaCl (0% B) to 1 M NaCl (100% B).  
*Bottom*: Coomassie-stained SDS-PAGE gel of cleavage assay with purified *E. coli* MS115-1 CapP, MBP-CapH-GFP, and combined fractions from HiTrap Q column. A similar assay with a Superdex 75 gel filtration column showed high activity across the entire separation range.  
 C *In vitro* cleavage assay with purified *E. coli* MS115-1 CapP, MBP-CapH-GFP, and the indicated nucleic acids.  
 D Fluorescence polarization DNA binding assay for *E. coli* MS115-1 CapP and either single-stranded DNA (circles and solid line;  $K_d = 1.7 \pm 0.6 \mu\text{M}$ ) or double-stranded DNA (squares; no binding detected). Error bars indicate standard deviation from three technical replicates.  
 E Fluorescence polarization DNA binding assay for *E. coli* MS115-1 CapP and single-stranded DNAs including a random sequence with all four bases (black diamonds;  $K_d = 4.7 \pm 1.2 \mu\text{M}$ ), poly-T (green squares;  $K_d = 1.8 \pm 0.3 \mu\text{M}$ ), poly-C (orange triangles; no binding detected), or poly-A (blue circles; no binding detected). Error bars indicate standard deviation from three technical replicates.

Source data are available online for this figure.
